# Supplementary material for: Laboratory development and validation of vapor phase PFAS methods for soil gas, sewer gas, and indoor air
Source: Royal Society of Chemistry journal article supplement (doi:10.1039/d4ea00084f), 2024-11-20
Supplement: d4ea00084f1.pdf [file d4ea00084f1.pdf]

## Supporting Information

### Additional Detailed Introduction:

Roth et al. (2020) investigated the occurrence of PFAS in the headspace above mildly agitated and dilute AFFF mixtures and found that 16 of the 30 measured PFAS were present: five FTOHs (0.5–38.1  $\mu\text{g}/\text{m}^3$ ), 10 PFCAs (0.4–13670  $\mu\text{g}/\text{m}^3$ ), and 1 FTS (72.1  $\mu\text{g}/\text{m}^3$ ). Measurements were made with TD samplers in combination with GC/MS and LC/MS/MS in combination with XAD resin/polyurethane foam (XAD/PUF) samplers. The 10 PFCAs detected ranged in carbon chain length from C<sub>5</sub> to C<sub>16</sub>. The dominant compounds were PFOA, PFHxA, and perfluorodecanoic acid (PFDA). The retention time and prominent fragment ions at m/z 69, 119, 131 and 169 matched well with the PFOA standard and fragmentation reported by Yamada et al. (2005). However, those ions are common to many compounds with a perfluoroalkyl chain.

In a subsequent comment on the Roth et al. (2020) publication, it was noted that PFOA appeared to thermally degrade to form perfluoro-1-heptene (PFHp-1) when PFOA was injected onto thermal desorption tubes and desorbed to a GC/MS, making it difficult to differentiate between PFHp-1 and other thermally labile PFAS such as PFOA (Titaley et al., 2020). Upon closer inspection of the experimental and published spectra of PFOA and PFHp-1, Roth et al. noted several inconsistencies between the expected and observed spectra, including the lack/presence of a m/z 44 (loss of CO<sub>2</sub>) and lack/presence of a m/z 45 (loss of COOH) present in the NIST published standard mass spectrum but not in other published GC/MS spectra. Thus, it is possible that the “PFOA-like peak” observed by GC/MS was aerosolized or volatilized PFOA (which was known to be present in the AFFF tested), but it is also possible that the single GC peak represents PFHp-1 and/or the sum of various thermally labile PFAS (Roth et al., 2020;

Titaley et al, 2020). This uncertainty about the volatility of the PFCAs motivates the current paper.

PFCAs are generally considered to be predominantly partitioned to the particulate phase in the atmosphere (ITRC, 2022). Since PFCAs are primarily ionic at environmentally relevant pH, in aqueous solution their volatility was initially expected to be low (ITRC, 2022). However multiple mechanisms for the PFCAs to enter the gas phase have been suggested: foam bubble bursting (Johansson et al., 2019); cosolvent effects on pKa (Bastow et al., 2022); and direct sublimation from the solid phase to the gas phase (Kaiser, 2010). However, Johansson et al. (2019) reported that PFCAs can be introduced into the atmosphere through bubble bursting. The formation of foams *in situ* in the presence of aqueous solutions of surfactants and gas flows has been previously reported, so a bubble bursting mechanism could conceivably be relevant to VI (Maire and Fatin-Rouge, 2017; Bertin et al., 2017). Additionally, Bastow et al. (2022) described how the equilibrium between ionized and neutral forms can be shifted toward the neutral PFAS, enhancing volatilization, when organic phases make up a significant component of the matrix (i.e., cosolvent effects). Gas phase PFHpA, PFHxA, and PFOA at concentrations below 2.5 ng/m<sup>3</sup> have been reported in indoor air at background sites (Shoeib et al., 2011). Additionally, Kaiser et al. (2010) measured sublimation (direct transition from solid phase to gas phase) of PFOA at 45°C. This work was done in both bench-scale measurements and at larger scale in a drying out sump in a manufacturing facility, in which, they measured 7 µg/m<sup>3</sup> PFOA in the air near an aqueous sump at pH 7, attributed primarily to sublimation from the walls of the sump. Detectable levels of PFOA were also observed in a weeklong bench scale studies being transported in gas phase nitrogen partitioned against a pH 7 PFOA solution in a round bottom flask.

In more recent research, the University of Nevada measured the Henry's law constants (HLCs) of 15 PFAS, but PFOA was not volatile enough to be measured until the pH was reduced substantially, suggesting PFOA is not volatile when dissolved in water at circumneutral pH, although cosolvent effects were not evaluated (Abusallout et al., 2022). Efforts by others to validate the COSMOtherm model for prediction of PFAS HLCs suggest that PFOA is relatively nonvolatile. However, this model and the experiments used to validate it considered the air/water interface an experimental artifact and worked to negate its effects (i.e., HLCs were obtained by dividing hexadecane:water partitioning coefficients by hexadecane:air coefficients, thus the air/water interface was avoided or not represented) (Endo et al., 2023). The air/water interface in soil systems is extensive and complex due to varying saturations in the capillary fringe and attributable to water table fluctuation (Sakaki et al., 2013). Together, these studies suggest that in the experiments conducted by Roth et al. (2020), where PFOA was measured in the gas phase, PFOA was aerosolized during the mild agitation of the AFFF or ejected as aerosols during popping of the AFFF bubbles immediately before the gas phase was collected, rather than present as a vapor. cosolvent effects may also explain the presence of gas phase PFOA.

#### Additional Methods Information

Initial calibration standards were prepared using purchased methanolic stock standards, where available, ranging from 2 to 100 µg/mL from Wellington Laboratories, Accustandard, and/or Cambridge Isotope Laboratories. The 12:2 FTOH material was purchased as a solid from Synquest Laboratories, and a stock standard prepared by weighing an amount into a class A volumetric flask, diluting to volume with methanol, and sonicating for 30 minutes. Table S6 lists the typical primary and secondary stock standards purchased for calibration used during the validation tests.

A multi-point initial calibration curve was generated by spiking CAMSCO PFAS/PFCA multi-bed sorbent tubes with 2.0  $\mu\text{L}$  of a 0.5  $\mu\text{g}/\text{mL}$  methanolic solution of 2-perfluorohexyl[1,1- $^2\text{H}_2$ ]-[1,2- $^{13}\text{C}_2$ ]ethanol as the internal standard (IS) and 2-Perfluorooctyl[1,2- $^{13}\text{C}_2$ ]ethanol as the field surrogate. Following the IS and surrogate addition, methanolic working standards containing the list of target PFAS were spiked onto tubes using aliquots from the working methanolic standards ranging from 1.0 to 4.0  $\mu\text{L}$  to generate a six-point calibration curve spanning from 0.1 ng to 10 ng with an internal standard and field surrogate concentration of 1.0 ng. Standards were spiked onto the sorbent tubes using an unheated injection port with a flow of ultra-pure nitrogen at a rate of 80 mL/min for 3 to 5 min to flush methanol from the sorbent tube prior to analysis.

The initial calibration linearity was evaluated following the procedure outlined in EPA Method TO-17, calculating the Relative Response Factor (RRF) at each calibration level, and determining the average RRF and the Relative Standard Deviation (RSD) across all the levels and evaluating against the TO-17 acceptance criterion of <30% RSD. Representative stock standards used during the laboratory validation studies can be found in Supporting Information Table S6.

Accuracy of the initial calibration curve was determined by spiking a methanolic working standard prepared from a second source. This initial calibration verification (ICV) standard was prepared in the same manner as a calibration standard with the addition of the internal standard and field surrogate. Independent sources of stock standards were not available for 5:2s FTOH, 7:2s FTOH, and 12:2 FTOH. For these targets, a second standard was independently prepared by a different chemist and/or using a second ampule purchased from the same vendor.

To comply with regulatory and TO-17 method requirements, Method Detection Limit (MDL) studies were conducted following CFR Appendix B Part 136 Revision 2. A minimum of seven spiked sorbent tubes and seven blank sorbent tubes were analyzed in three separate analytical batches over three days with a minimum of two spikes and two blanks analyzed on each day. The spikes were prepared by spiking methanolic working standards at 0.1 ng for each target compound following the procedures used for calibration standards. Blanks were prepared by spiking conditioned sorbent tubes with IS and surrogate only. The method MDL for each target compound was determined by evaluating both blank and spike samples.

#### Approach to Tentatively Identify Compounds without Calibration Standards

Calibration standards were not available for the 9:2s, 11:2s, and 13:2s fluorotelomer alcohols. In the absence of calibration standards and full scan EI spectra in the literature, the laboratory developed an approach to tentatively identify these compounds based on data generated for a calibrated list of fluorotelomer alcohols. The retention time for the uncalibrated secondary alcohols was based on the observation that 5:2s FTOH and 7:2s FTOH eluted at a similar retention time as 4:2 and 6:2 FTOH, respectively, on the TD-GC/MS system using the Agilent DB-624 UI 60 m x 0.25 mm ID x 1.4  $\mu\text{m}$  column and associated GC temperature program (Figure S2). Assuming similar behavior with increasing chain length and utilizing a consistent GC temperature ramp rate across the elution of the target compounds, retention time windows for 9:2s, 11:2s, and 13:2s FTOH were set up consistent with the corresponding calibrated 8:2, 10:2, and 12:2 FTOHs, respectively.

Reviewing the MRM transitions used for quantitation of the calibrated secondary FTOHs, the precursor mass ion for 7:2s FTOH exhibited a predictable increase of  $m/z$  100 ( $\text{C}_2\text{F}_4$ ) relative to 5:2s FTOH, reflecting the additional two perfluorinated carbons in the 7:2s FTOH structure.

The MRM transitions added to the instrument acquisition program and expected time segment assume a precursor mass ion that increases by  $m/z$  100 for each  $C_2F_4$  increase in the structure. To estimate a Relative Response Factor (RRF) for the tentatively identified compounds, the RRFs were evaluated for the representative 5:2s and 7:2s FTOH MRM transition. The RRF for 7:2s FTOH was consistently approximately twice that of 5:2s FTOH; however, extrapolating this relationship to the uncalibrated longer chain secondary FTOHs based on two points was not warranted, thus we used the RRF of 7:2s FTOH to estimate the uncalibrated secondary alcohols.

**Table S1. PFAS Compounds Assessed**

| CAS         | Short Name | Compound Class | Compound                              | Standard Commercially Available?                               | Initial Analytical Method Completed Prior to US EPA, 2023 and Schumacher et al., 2023 |
|-------------|------------|----------------|---------------------------------------|----------------------------------------------------------------|---------------------------------------------------------------------------------------|
| 2043-47-2   | 4:2 FTOH   | FTOH           | 2-Perfluorobutyl ethanol              | Yes, at least two sources                                      | Yes                                                                                   |
| 914637-05-1 | 5:2 sFTOH  | sFTOH          | 1-Perfluoropentyl ethanol             | Available from single source                                   | Yes                                                                                   |
| 647-42-7    | 6:2 FTOH   | FTOH           | 2-Perfluorohexyl ethanol              | Yes, at least two sources                                      | Yes                                                                                   |
| 24015-83-6  | 7:2 sFTOH  | sFTOH          | 1-Perfluoroheptyl ethanol             | Available from single source                                   | Yes                                                                                   |
| 678-39-7    | 8:2 FTOH   | FTOH           | 2-Perfluorooctyl ethanol              | Yes, at least two sources                                      | Yes                                                                                   |
| --          | 9:2 sFTOH  | sFTOH          | 1-Perfluorononyl ethanol              | No standard found to date, none available in Yoo et al. (2010) | No                                                                                    |
| 865-86-1    | 10:2 FTOH  | FTOH           | 2-Perfluorodecyl ethanol              | Yes, at least two sources                                      | Yes                                                                                   |
| --          | 11:2 sFTOH | sFTOH          | 1-Perfluoroundecyl ethanol            | No standard found to date; none available in Yoo et al. (2010) | No                                                                                    |
| 39239-77-5  | 12:2 FTOH  | FTOH           | 2-Perfluorododecyl ethanol            | Available from single source                                   | No                                                                                    |
| --          | 13:2 sFTOH | sFTOH          | 1-Perfluorotridecyl ethanol           | No standard found to date; none available in Yoo et al. (2010) | No                                                                                    |
| 335-67-1    | PFOA       | PFCA           | Perfluorooctanoic acid                | Yes, at least two sources                                      | Yes                                                                                   |
| 4151-50-2   | N-EtFOSA   | FOSA           | n-Ethylperfluoro-1-octansulfonamide   | Yes, at least two sources                                      | Yes                                                                                   |
| 31506-32-8  | N-MeFOSA   | FOSA           | n-Methylperfluoro-1-octanesulfonamide | Yes, at least two sources                                      | Yes                                                                                   |
| 375-22-4    | PFBA       | PFCA           | Perfluorobutanoic acid                | Yes, at least two sources                                      | Yes                                                                                   |
| 375-85-9    | PFHpA      | PFCA           | Perfluoroheptanoic acid               | Yes, at least two                                              | Yes                                                                                   |

| CAS       | Short Name | Compound Class | Compound                | Standard Commercially Available? | Initial Analytical Method Completed Prior to US EPA, 2023 and Schumacher et al., 2023 |
|-----------|------------|----------------|-------------------------|----------------------------------|---------------------------------------------------------------------------------------|
|           |            |                |                         | sources                          |                                                                                       |
| 307-24-4  | PFHxA      | PFCA           | Perfluorohexanoic acid  | Yes, at least two sources        | Yes                                                                                   |
| 2706-90-3 | PFPeA      | PFCA           | Perfluoropentanoic acid | Yes, at least two sources        | Yes                                                                                   |

Note: FOSA = perfluorooctanesulfonamide; FTOH = fluorotelomer alcohols; sFTOH = secondary fluorotelomer alcohol; PFCA = perfluorocarboxylic acid



**Table S2. Initial TO-17 PFAS Method Parameters utilized for soil gas analysis in field studies reported by RTI (2022) and Schumacher et al. (2023).**

| Gerstel Thermal Desorption (3.5+) Settings |                                                                           |
|--------------------------------------------|---------------------------------------------------------------------------|
| Transfer Temperature                       | 300°C                                                                     |
| Transfer Temperature Mode                  | Fixed                                                                     |
| Desorption Mode:                           | Splitless                                                                 |
| Sample Mode:                               | Remove Tube – no Standby Cooling                                          |
| Standby Temperature:                       | 50°C                                                                      |
| Dry Purge:                                 | Not used                                                                  |
| Tube Desorption Temperature Program        |                                                                           |
| Initial Temperature                        | 50°C                                                                      |
| Delay Time                                 | 0.5 min                                                                   |
| Initial Time                               | 0.00 min                                                                  |
| Ramp 1 – Rate 1                            | 400°C/min                                                                 |
| End Temperature                            | 300°C                                                                     |
| Hold time                                  | 5.0 min                                                                   |
| CIS Focusing Trap                          |                                                                           |
| Carrier Gas                                | Helium                                                                    |
| Initial Temperature                        | -130°C                                                                    |
| Equilibration Time                         | 0.25min                                                                   |
| Initial Time                               | 0.00 min                                                                  |
| Ramp 1: Rate:                              | 12°C/min                                                                  |
| End Temp:                                  | 275°C                                                                     |
| Hold Time:                                 | 4.00min                                                                   |
| Trap type:                                 | Quartz wool deactivated (PN012437)                                        |
| Agilent 8890 GC parameters                 |                                                                           |
| Column                                     | DB-624 Ultra Inert 60m x 0.25mm ID x 1.4 µm                               |
| Flow                                       | 1 mL/min                                                                  |
| Control mode                               | Constant Flow                                                             |
| Initial Temperature                        | 40°C Hold Time = 3 min                                                    |
| Ramp                                       | 15°C/min                                                                  |
| Final Temperature                          | 230°C Hold for 4.34 minutes                                               |
| Front PTV Inlet                            | Helium                                                                    |
| Mode                                       | Solvent Vent                                                              |
| Purge Flow to Split Vent                   | 5 to 10 mL/min at 0.01 min (Low split)<br>200 mL/min at 0.01 (High split) |
| Vent Flow                                  | 50 mL/min                                                                 |
| Agilent 7000D Tandem Mass Spectrometer     |                                                                           |
| MSD Transfer Line                          | 250°C                                                                     |
| Quench Gas He                              | 2.5 mL/min                                                                |
| Collision Gas N2                           | 1.5 mL/min                                                                |
| Source Temperature                         | 250°C                                                                     |

**Table S3. Initial TO-17 analytical performance using Table 1 method parameters used for soil gas analysis (RTI, 2022; Schumacher et al., 2023)**

High sensitivity method (low split) calibration range = 0.05 ng to 5.0 ng

Low sensitivity method (high split) calibration range = 1.0 to 60 PFCAs, 1.0 ng to 500 ng FTOH

| Analyte   | High Sensitivity Method |          | Low Sensitivity Method |          | %DE <sup>d</sup> |
|-----------|-------------------------|----------|------------------------|----------|------------------|
|           | Linearity (%RSD)        | ICV (%R) | Linearity (%RSD)       | ICV (%R) |                  |
| PFBA      | 10                      | 112      | 17                     | 116      | 100              |
| PFPeA     | 13                      | 126      | 14                     | 134      | 100              |
| PFHxA     | 13                      | 115      | 17                     | 122      | 100              |
| PFHpA     | 11                      | 103      | 5.4                    | 119      | 100              |
| PFOA      | 6.5                     | 90       | 20                     | 88       | 100              |
| 4:2 FTOH  | 6.7                     | 94       | 8.8                    | 78       | 100              |
| 5:2s FTOH | 5.8                     | 104      | 7.6                    | 82       | 99.8             |
| 6:2 FTOH  | 21 <sup>a</sup>         | 73       | 14                     | 81       | 99.6             |
| 7:2s FTOH | 8.4                     | 105      | 9.3                    | 81       | 99.9             |
| 8:2 FTOH  | 21                      | 72       | 10                     | 76       | 99.5             |
| 10:2 FTOH | 21                      | 73       | 9.6                    | 78       | 99.4             |
| n-MeFOSA  | 27 <sup>b</sup>         | 43       | 32 <sup>c</sup>        | 89       | 100              |
| n-EtFOSA  | 24 <sup>b</sup>         | 48       | 24 <sup>c</sup>        | 87       | 100              |

a. Low calibration level = 0.1 ng

b. Low calibration level = 0.6 ng (4-point calibration)

c. Low calibration level = 5.0 ng (4-point calibration); high calibration level = 60 ng

d. Desorption efficiency evaluated at 60 ng for PFCAs and n-MeFOSA and n-EtFOSA and at 500 ng for FTOHs.

**Table S4. Modified TO-17 PFAS Vapor Phase Compound Reporting Limits and QC Acceptance Criteria.**

| Analytes                                          | Reporting Limit<br>(ng total per<br>sample tube) | Acceptance Criteria      |                             |          |
|---------------------------------------------------|--------------------------------------------------|--------------------------|-----------------------------|----------|
|                                                   |                                                  | ICAL <sup>†</sup> (%RSD) | LCS (% R)                   | CCV (%D) |
| 2-Perfluorobutyl ethanol (4:2 FTOH)               | 0.10                                             | ≤30                      | 60-140                      | 30       |
| 2-Perfluorohexyl ethanol (6:2 FTOH)               | 0.20                                             | ≤ 30                     | 60-140                      | 30       |
| 1-Perfluoroheptyl ethanol (7:2 FTOH)              | 0.10                                             | ≤ 30                     | 60-140                      | 30       |
| 2-Perfluorooctyl ethanol (8:2 FTOH)               | 0.10                                             | ≤ 30                     | 60-140                      | 30       |
| 2-Perfluorodecyl ethanol (10:2 FTOH)              | 0.10                                             | ≤ 30                     | 60-140                      | 30       |
| Perfluorobutanoic acid (PFBA)                     | 0.40                                             | ≤ 30                     | 60-140                      | 40       |
| Perfluoropentanoic acid (PFPeA)                   | 0.10                                             | ≤ 30                     | 60-140                      | 40       |
| Perfluoroheptanoic acid (PFHpA)                   | 0.10                                             | ≤ 30                     | 60-140                      | 40       |
| Perfluorohexanoic acid (PFHxA)                    | 0.10                                             | ≤ 30                     | 60-140                      | 40       |
| Perfluorooctanoic acid (PFOA)                     | 0.10                                             | ≤ 30                     | 60-140                      | 40       |
| n-Methylperfluoro-1-octanesulfonamide (N-MeFOSA)* | 1.0                                              | ≤ 40                     | 50-150                      | 50       |
| n-Ethylperfluoro-1-octanesulfonamide (N-EtFOSA)*  | 1.0                                              | ≤ 40                     | 50-150                      | 50       |
| <b>Internal Standards (IS)</b>                    |                                                  |                          |                             |          |
| <b>Analyte</b>                                    | <b>CCV IS % Recovery</b>                         |                          | <b>Sample IS % Recovery</b> |          |
| 2-Perfluorohexyl[1,1-2H2]-[1,2-13C2]ethanol       | 60 – 140                                         |                          | 60 – 140                    |          |

\*Data were qualified as estimated due to the variability in observed recovery.

†ICAL = Initial Calibration, LCS = Laboratory Control Sample, CCV = Continuing Calibration Verification, %D = % Difference, %R = % Recovery, %RSD = % Relative Standard Deviation

**Table S5. Instrument parameters for method validation (Gerstel TD 3.5+ and Markes TD100-xr)**

| <b>(Gerstel 3.5+) Thermal Desorption Settings</b> |                                             |
|---------------------------------------------------|---------------------------------------------|
| Transfer Temperature                              | 300°C                                       |
| Transfer Temperature Mode                         | Fixed                                       |
| Desorption Mode:                                  | Splitless                                   |
| Sample Mode:                                      | Remove Tube – no Standby Cooling            |
| Standby Temperature:                              | 50°C                                        |
| Dry Purge:                                        | Not used                                    |
| <b>Tube Desorption Temperature Program</b>        |                                             |
| Initial Temperature                               | 50°C                                        |
| Delay Time                                        | 0.5 min                                     |
| Initial Time                                      | 0.00 min                                    |
| Ramp 1 – Rate 1                                   | 400°C/min                                   |
| End Temperature                                   | 320°C                                       |
| Hold time                                         | 10.0 min                                    |
| <b>CIS Focusing Trap</b>                          |                                             |
| Carrier Gas                                       | Helium                                      |
| Initial Temperature                               | -150°C                                      |
| Equilibration Time                                | 0.25 min                                    |
| Initial Time                                      | 0.00 min                                    |
| Ramp 1: Rate:                                     | 12°C/min                                    |
| End Temp:                                         | 275°C                                       |
| Hold Time:                                        | 4.00 min                                    |
| Trap type:                                        | Quartz wool deactivated                     |
| <b>Agilent 8890 GC parameters</b>                 |                                             |
| Column                                            | DB-624 Ultra Inert 60m x 0.25mm ID x 1.4 µm |
| Flow                                              | 1 mL/min                                    |
| Control mode                                      | Constant Flow                               |
| Initial Temperature                               | 40°C Hold Time = 3 min                      |
| Ramp                                              | 15°C/min                                    |
| Final Temperature                                 | 230°C Hold for 4.34 minutes                 |
| Front PTV Inlet Mode                              | Solvent vent                                |
| PTV Total Flow                                    | On 6 mL/min                                 |
| Purge Flow to Split Vent                          | 5 mL/min at 0.01 min                        |
| Vent Flow                                         | 50 mL/min                                   |
| <b>Agilent 7000D Tandem Mass Spectrometer</b>     |                                             |
| MSD Transfer Line                                 | 250°C                                       |
| Quench Gas He                                     | 2.5 mL/min                                  |
| Collision Gas N2                                  | 1.5 mL/min                                  |
| Source Temperature                                | 250°C                                       |

| <b>Markes TD100-xr</b>                        |                                               |
|-----------------------------------------------|-----------------------------------------------|
| Carrier gas                                   | Helium                                        |
| Flow path temperature                         | 150°C                                         |
| Dry purge time                                | 3 min                                         |
| Dry purge flow                                | 40 mL/min                                     |
| Desorb 1 time                                 | 10 min                                        |
| Desorb 1 temperature                          | 320°C                                         |
|                                               |                                               |
| Desorb 1 trap flow                            | 50 mL/min                                     |
|                                               |                                               |
| Trap purge time                               | 1 min                                         |
| Trap purge flow                               | 20 mL/min                                     |
| Trap Low Temperature                          | 20°C                                          |
| Trap heat rate                                | MAX                                           |
| Trap high temperature                         | 290°C                                         |
| Trap desorb time                              | 3 min                                         |
|                                               |                                               |
| Trap desorb split flow                        | 5 mL/min                                      |
| Focusing Trap                                 | U-T12ME-2S                                    |
| <b>Agilent 8890 GC parameters</b>             |                                               |
| Column                                        | DB-624 Ultra Inert 60 m x 0.25 mm ID x 1.4 µm |
| Flow                                          | 1 mL/min                                      |
| Control mode                                  | Constant Flow                                 |
| Initial Temperature                           | 40°C Hold Time = 3 min                        |
| Ramp                                          | 15°C/min                                      |
| Final Temperature                             | 230°C Hold for 4.34 minutes                   |
|                                               |                                               |
| Back Inlet Mode                               | Splitless                                     |
| Heater                                        | On 150°C                                      |
|                                               |                                               |
| Septum purge flow                             | On 0.5 mL/min                                 |
|                                               |                                               |
|                                               |                                               |
| <b>Agilent 7000D Tandem Mass Spectrometer</b> |                                               |
| MSD Transfer Line                             | 250°C                                         |
| Quench Gas He                                 | 2.5 mL/min                                    |
| Collision Gas N2                              | 1.5 mL/min                                    |
| Source Temperature                            | 250°C                                         |

**Table S6. Representative Stock standards utilized for Laboratory Validation Studies**

| CAS         | Compound                                         | Vendors                              | Stock Solution Concentration in MeOH ( $\mu\text{g/mL}$ ) | Chemical Purity |
|-------------|--------------------------------------------------|--------------------------------------|-----------------------------------------------------------|-----------------|
| 2043-47-2   | 2-Perfluorobutyl ethanol (4:2 FTOH)              | Wellington Laboratories              | $50.0 \pm 2.5$                                            | >98%            |
|             |                                                  | Accustandard                         | $98.6 \pm 2.4$                                            | $\geq 98\%$     |
| 914637-05-1 | 1-Perfluoropentyl ethanol (5:2s FTOH)            | Wellington Laboratories              | $50.0 \pm 2.5$                                            | >98%            |
| 647-42-7    | 2-Perfluorohexyl ethanol (6:2 FTOH)              | Wellington Laboratories              | $50.0 \pm 2.5$                                            | >98%            |
|             |                                                  | Accustandard                         | $100.4 \pm 2.4$                                           | 99.0            |
| 24015-83-6  | 1-Perfluoroheptyl ethanol (7:2s FTOH)            | Wellington Laboratories              | $50.0 \pm 2.5$                                            | >98%            |
| 678-39-7    | 2-Perfluorooctyl ethanol (8:2 FTOH)              | Wellington Laboratories              | $50.0 \pm 2.5$                                            | >98%            |
|             |                                                  | Accustandard                         | $101.1 \pm 2.4$                                           | 94.0            |
| 865-86-1    | 2-Perfluorodecyl ethanol (10:2 FTOH)             | Wellington Laboratories              | $50.0 \pm 2.5$                                            | >98%            |
|             |                                                  | Cambridge Isotope Laboratories, Inc. | $50.0 \pm 0.5$                                            | 98.4%           |
| 39239-77-5  | 2-Perfluorododecyl ethanol (12:2 FTOH)           | Synquest Laboratories                | Solid                                                     | 82%             |
| 4151-50-2   | n-Ethylperfluoro-1-octanesulfonamide (n-EtFOSA)  | Cambridge Isotope Laboratories, Inc. | $100.0 \pm 1.2$                                           | 94%             |
|             |                                                  | Accustandard                         | $101.8 \pm 2.4$                                           | 97.1%           |
| 31506-32-8  | n-Methylperfluoro-1-octanesulfonamide (n-MeFOSA) | Cambridge Isotope Laboratories, Inc. | $100.0 \pm 0.3$                                           | 98%             |
|             |                                                  | Accustandard                         | $101.1 \pm 2.4$                                           | 96.1            |
| 375-22-4    | Perfluorobutanoic acid (PFBA)                    | Wellington Laboratories              | $2.00 \pm 0.1$                                            | >98%            |
|             |                                                  | Accustandard                         | $101.9 \pm 2.4$                                           | 100%            |
| 375-85-9    | Perfluoroheptanoic acid (PFHpA)                  | Wellington Laboratories              | $2.00 \pm 0.1$                                            | >98%            |
|             |                                                  | Accustandard                         | $103.0 \pm 2.4$                                           | 97.0%           |
| 307-24-4    | Perfluorohexanoic acid (PFHxA)                   | Wellington Laboratories              | $2.00 \pm 0.1$                                            | >98%            |
|             |                                                  | Accustandard                         | $101.4 \pm 2.4$                                           | 100%            |
| 2706-90-3   | Perfluoropentanoic acid (PFPeA)                  | Wellington Laboratories              | $2.00 \pm 0.1$                                            | >98%            |

| CAS      | Compound                                                                          | Vendors                 | Stock Solution Concentration in MeOH ( $\mu\text{g/mL}$ ) | Chemical Purity |
|----------|-----------------------------------------------------------------------------------|-------------------------|-----------------------------------------------------------|-----------------|
|          |                                                                                   | Accustandard            | $100.6 \pm 2.4$                                           | 99.0%           |
| 335-67-1 | Perfluorooctanoic acid (PFOA)                                                     | Wellington Laboratories | $2.00 \pm 0.1$                                            | >98%            |
|          |                                                                                   | Accustandard            | $101.8 \pm 2.4$                                           | 100%            |
| NA       | 2-Perfluorohexyl-[1,1- $^2\text{H}_2$ ]-[1,2- $^{13}\text{C}_2$ ]-ethanol         | Wellington Laboratories | $50.0 \pm 2.5$                                            | >98%            |
| NA       | 2-Perfluorooctyl (1,2- $^{13}\text{C}_2$ ) ethanol ( $^{13}\text{C}_2$ -8:2 FTOH) | Wellington Laboratories | $50.0 \pm 2.5$                                            | >98%            |

**Table S7. Experiment 3 Test Matrix**

| Column                                                                                                    | PFOA                                                         |                                                                               | PFHp-1                                                       |                                                                               |
|-----------------------------------------------------------------------------------------------------------|--------------------------------------------------------------|-------------------------------------------------------------------------------|--------------------------------------------------------------|-------------------------------------------------------------------------------|
|                                                                                                           | Direct Inject                                                | Thermal Desorption                                                            | Direct Inject                                                | Thermal Desorption                                                            |
| Agilent HP-5MS (SVOC)<br>30 m x 0.25 mm x 0.2 $\mu\text{m}$<br><i>40°C for 3 min, 15°C/min to 230°C</i>   | 1.0 $\mu\text{L}$ aliquot;<br>Injection port temp<br>@ 280°C | 1.0 $\mu\text{L}$ aliquot on<br>sorbent tube;<br>Desorb @ 320°C for<br>10 min | 1.0 $\mu\text{L}$ aliquot;<br>Injection port temp<br>@ 280°C | 1.0 $\mu\text{L}$ aliquot on<br>sorbent tube;<br>Desorb @ 320°C for<br>10 min |
| Agilent DB-624 UI (VOC)<br>60 m x 0.25 mm x 1.4 $\mu\text{m}$<br><i>40°C for 3 min, 15°C/min to 230°C</i> | 1.0 $\mu\text{L}$ aliquot;<br>Injection port temp<br>@ 280°C | 1.0 $\mu\text{L}$ aliquot on<br>sorbent tube;<br>Desorb @ 320°C for<br>10 min | 1.0 $\mu\text{L}$ aliquot;<br>Injection port temp<br>@ 280°C | 1.0 $\mu\text{L}$ aliquot on<br>sorbent tube;<br>Desorb @ 320°C for<br>10 min |

**Table S8. MRM transitions for PFAS Identification**

| Compound                                                                                                                          | Precursor | Product |
|-----------------------------------------------------------------------------------------------------------------------------------|-----------|---------|
| PFBA                                                                                                                              | 150       | 100     |
|                                                                                                                                   | 150       | 69      |
|                                                                                                                                   | 100       | 69      |
| PFPeA                                                                                                                             | 200       | 131     |
|                                                                                                                                   | 200       | 69      |
| PFHxA                                                                                                                             | 250       | 131     |
|                                                                                                                                   | 180       | 131     |
|                                                                                                                                   | 250       | 69      |
| PFHpA                                                                                                                             | 300       | 131     |
|                                                                                                                                   | 231       | 181     |
|                                                                                                                                   | 300       | 69      |
| PFOA                                                                                                                              | 350       | 131     |
|                                                                                                                                   | 231       | 181     |
|                                                                                                                                   | 350       | 69      |
| 4:2 FTOH                                                                                                                          | 244       | 127     |
|                                                                                                                                   | 95        | 69      |
|                                                                                                                                   | 196       | 77      |
|                                                                                                                                   | 263       | 195     |
| 5:2s FTOH                                                                                                                         | 299       | 69      |
|                                                                                                                                   | 219       | 69      |
|                                                                                                                                   | 313       | 43      |
| 7:2s FTOH                                                                                                                         | 399       | 69      |
|                                                                                                                                   | 319       | 69      |
|                                                                                                                                   | 355       | 86      |
|                                                                                                                                   | 319       | 131     |
| 6:2 FTOH                                                                                                                          | 344       | 127     |
|                                                                                                                                   | 295       | 69      |
|                                                                                                                                   | 295       | 231     |
|                                                                                                                                   | 363       | 295     |
| Isotopically labelled 6:2FTOH (2-Perfluorohexyl-[1,1- <sup>2</sup> H <sub>2</sub> ]-[1,2- <sup>13</sup> C <sub>2</sub> ]-ethanol) | 348       | 129     |
|                                                                                                                                   | 96        | 69      |
| 2-Perfluorooctyl (1,2- <sup>13</sup> C <sub>2</sub> ) ethanol (13C2-8:2 FTOH)                                                     | 446       | 128     |
|                                                                                                                                   | 407       | 69      |
|                                                                                                                                   | 446       | 96      |
|                                                                                                                                   | 465       | 396     |
| 8:2 FTOH                                                                                                                          | 444       | 127     |
|                                                                                                                                   | 395       | 95      |
|                                                                                                                                   | 463       | 395     |
|                                                                                                                                   | 395       | 131     |
| 10:2 FTOH                                                                                                                         | 544       | 127     |
|                                                                                                                                   | 505       | 119     |
|                                                                                                                                   | 505       | 169     |
|                                                                                                                                   | 563       | 495     |
| 12:2 FTOH                                                                                                                         | 605       | 69      |
|                                                                                                                                   | 595       | 69      |
|                                                                                                                                   | 663       | 595     |
|                                                                                                                                   | 644       | 127     |



| Compound | Precursor | Product |
|----------|-----------|---------|
| n-MeFOSA | 448       | 69      |
|          | 131       | 69      |
| n-EtFOSA | 448       | 69      |
|          | 108       | 80      |
|          | 219       | 69      |

**Table S9. IDOC Performance Comparison on Gerstel and Markes**

| Analyte     | Gerstel 3.5+     |                             | Markes TD100-xr  |                             |
|-------------|------------------|-----------------------------|------------------|-----------------------------|
|             | Average Recovery | Relative Standard Deviation | Average Recovery | Relative Standard Deviation |
| 4:2 FTOH    | 97%              | 4.1%                        | 96%              | 9.5%                        |
| 5:2s FTOH*  | 112%             | 1.6%                        | 93%              | 7.6%                        |
| 6:2 FTOH    | 110%             | 3.3%                        | 92%              | 5.9%                        |
| 7:2s FTOH*  | 127%             | 10%                         | 91%              | 7.5%                        |
| 8:2 FTOH    | 109%             | 20%                         | 100%             | 3.9%                        |
| 10:2 FTOH   | 104%             | 17%                         | 78%              | 8.8%                        |
| 12:2 FTOH** | 110%             | 13%                         | 76%              | 9.3%                        |
| N-MeFOSA    | 103%             | 20%                         | 95%              | 8.2%                        |
| N-EtFOSA    | 104%             | 19%                         | 95%              | 9.7%                        |

\*Second source stock standards not commercially available. Same lot number provided by vendor, prepared using different ampoules.

\*\*Second source not available; independently prepared from neat material.

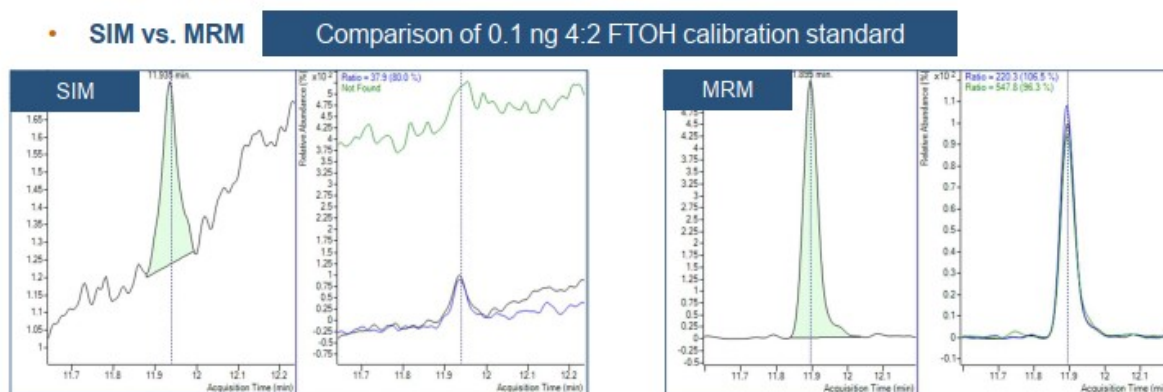

**Figure S1. Sensitivity Benefit of MRM (MS/MS) shown in right panels over Selected Ion Monitoring (SIM) with SQ MS shown in left two panels**

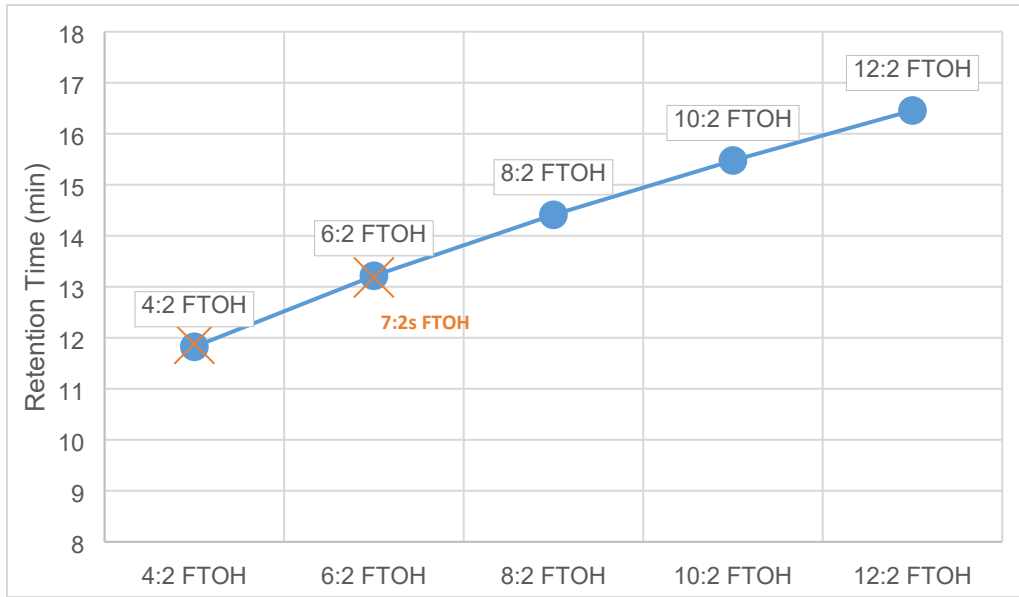

**Figure S2. Retention Time Relationship between Calibrated Secondary and Linear FTOH.**

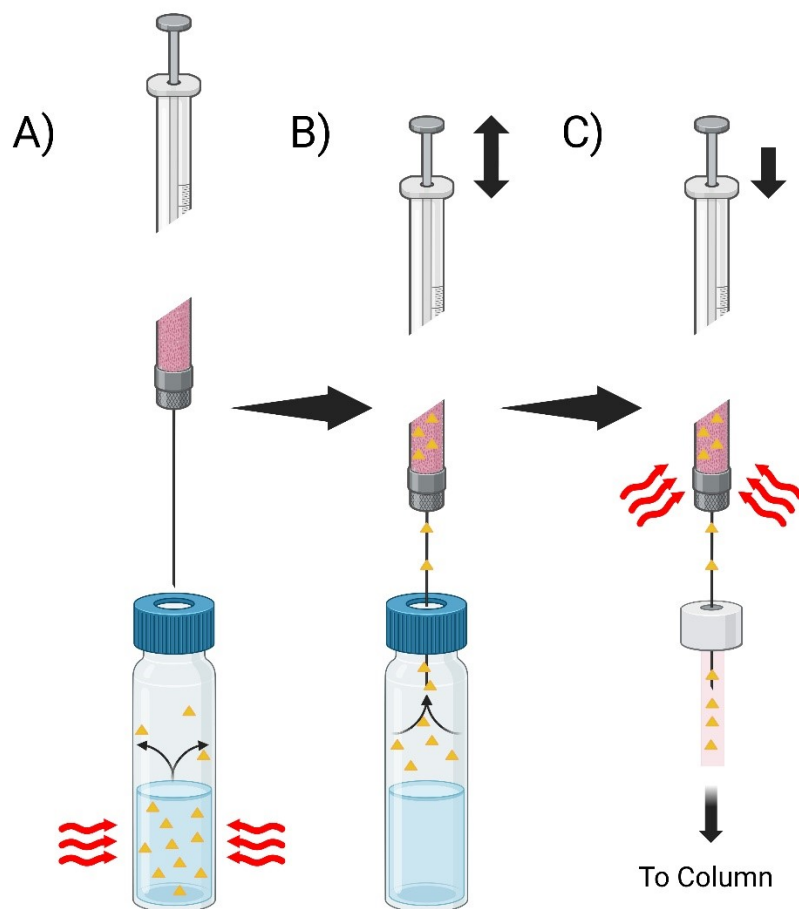

**Figure S3: Process of Typical ITEX-DHS Injection.** Note that in experiments conducted in this research, the sample was solid phase PFOA without a solvent. **A)** sample vial is heated and agitated to partition analytes into the headspace. **B)** headspace is drawn over the sorbent a specified number of times to sorb analytes. **C)** sorbent is flash heated to desorb analytes into a specified volume of headspace and the mixture injected directly into the GC inlet.

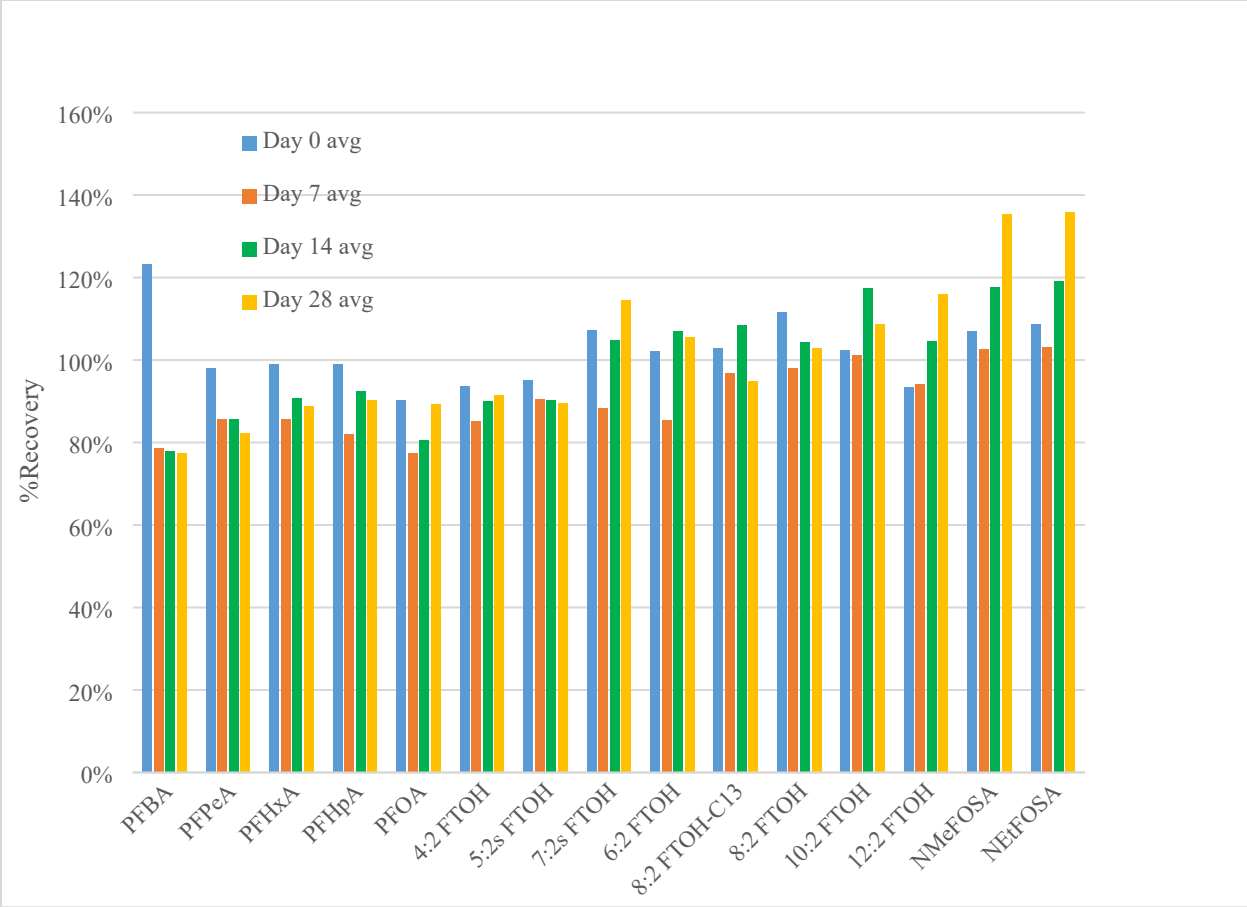

**Figure S4. Storage Stability Test Results – Each bar represents the average recovery of a set of three tubes; colors represent holding times as per key.**

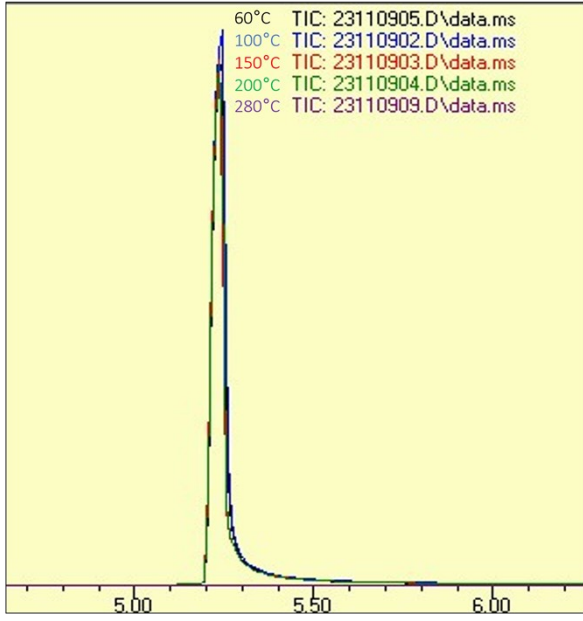

**Figure S5a. Experiment 1: Total Ion Chromatograms of Direct Injections of PFOA in Dichloromethane across GC Inlet Temperatures of 60°C to 280°C**

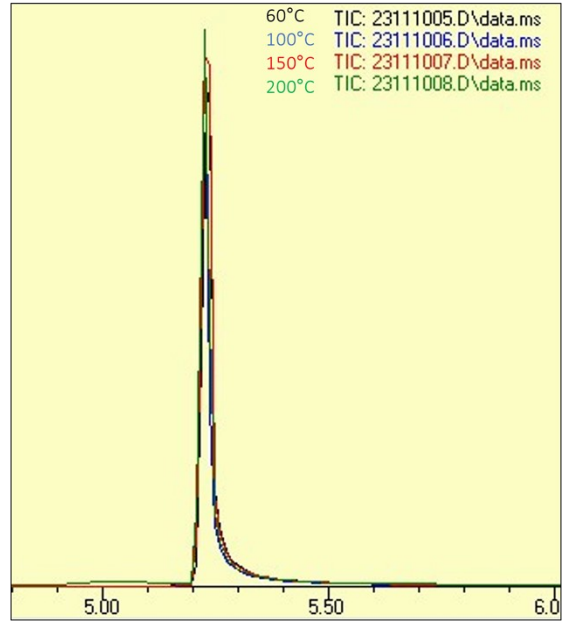

**Figure S5b. Experiment 1: Total Ion Chromatograms of Direct Injections of PFOA in Methanol across GC Inlet Temperatures of 60°C to 280°C**

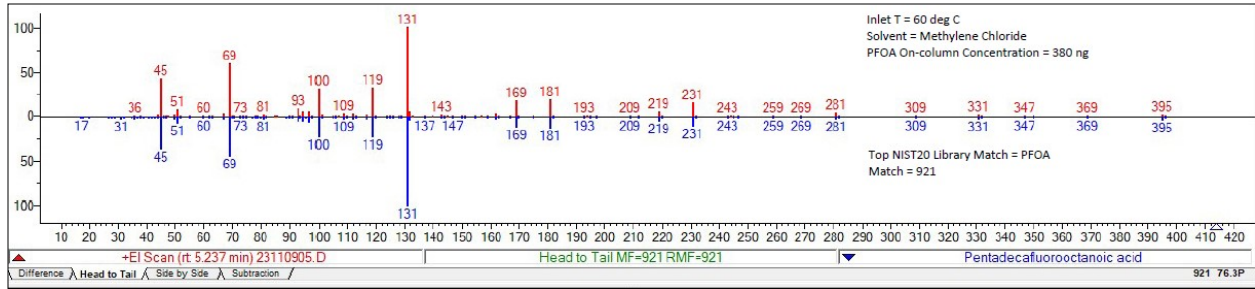

**Figure S6a. Experiment 1 PFOA Spectra 60°C Inlet Temperature (5700 µg/mL in Dichloromethane) – Red Is Experimental Data and Blue Is the NIST Library Match Spectra**

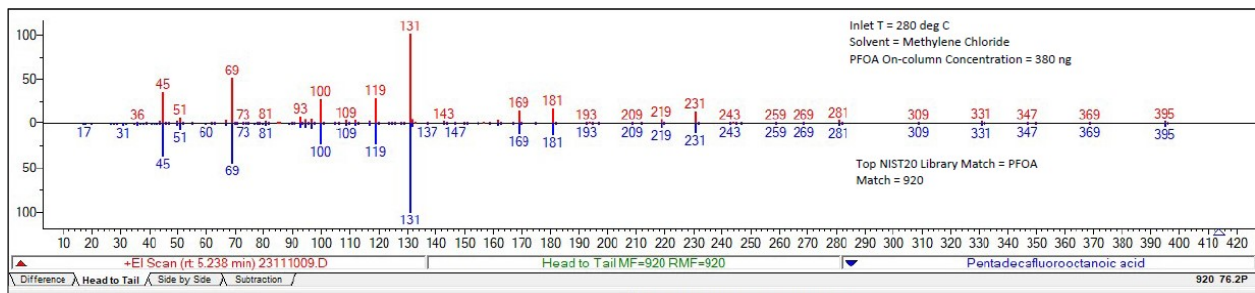

**Figure S6b. Experiment 1 PFOA Spectra 280°C Inlet Temperature (5700 µg/mL in Dichloromethane)**

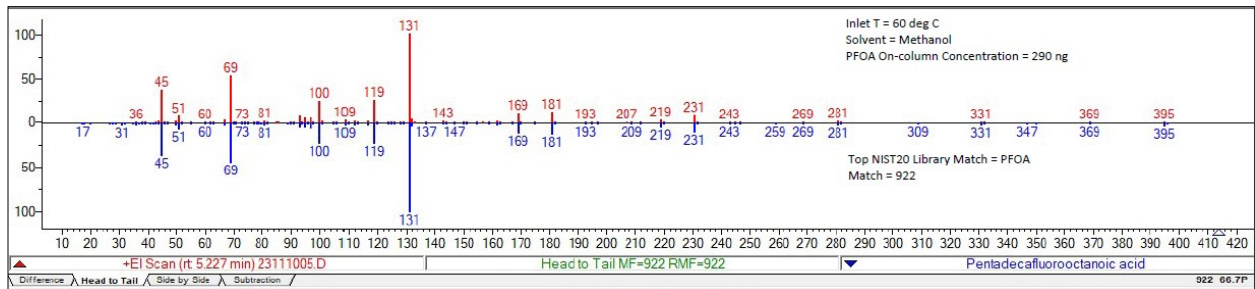

**Figure S6c. Experiment 1 PFOA Spectra 60°C Inlet Temperature (4300 µg/mL in Methanol)**

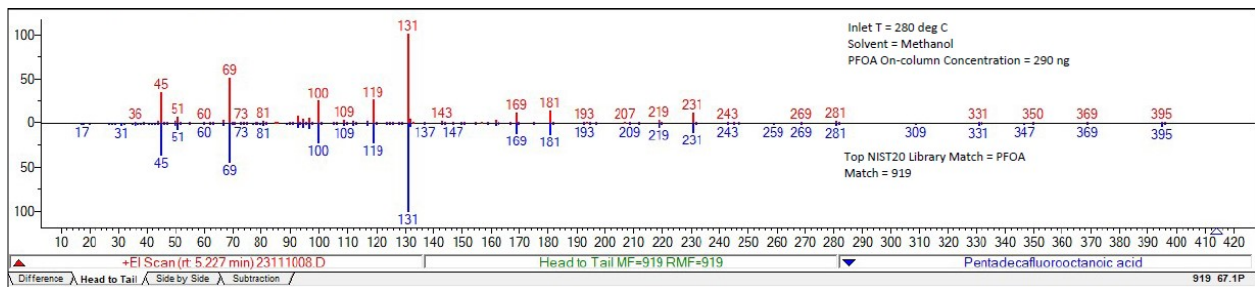

**Figure S6d. Experiment 1 PFOA Spectra 280°C Inlet Temperature (4300 µg/mL in Methanol)**

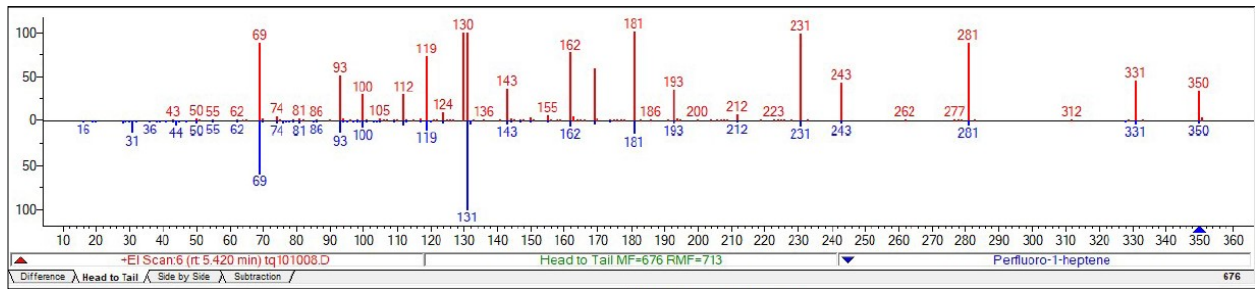

**Figure S7a. Experiment 2: Thermal Desorption Peak (A) Apex Mass Spectrum. Red Is Experimental Data and Blue Is the Library Match Spectra.**

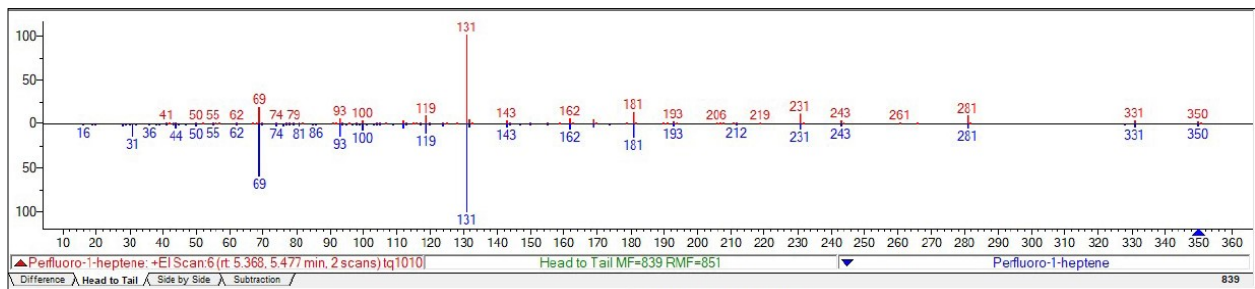

**Figure S7b. Experiment 2 Thermal Desorption Peak (A) Left and Right Shoulder of Peak Mass Spectra.**

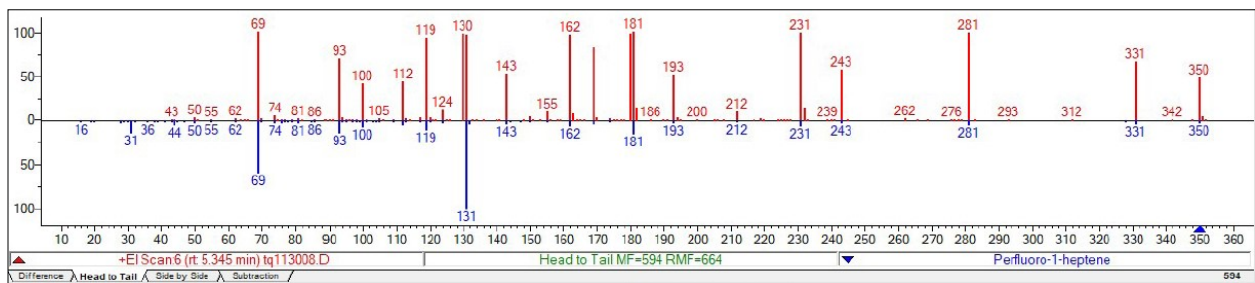

**Figure S8. Experiment 2: Saturated Peak (A) Mass Spectra (Apex) With 250°C Tube/Trap Desorption Temperature**

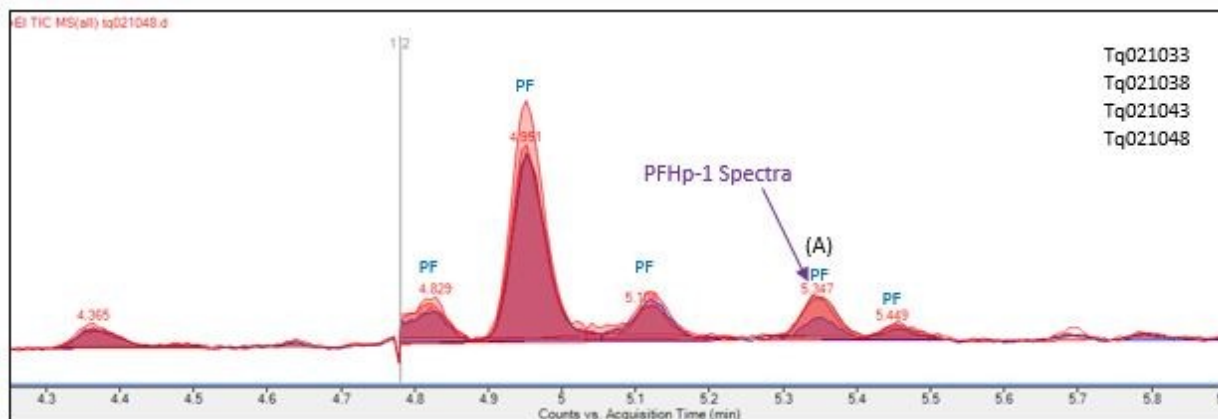

**Figure S9. Total Ion Chromatogram Overlay of 4 Replicate 100 ng PFHp-1 spiked tubes analyzed by TD-GC/MS/MS**

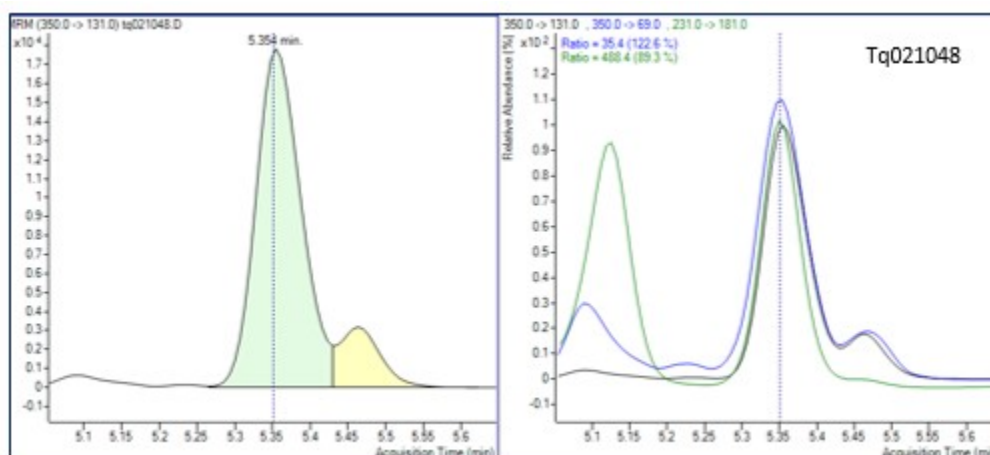

**Figure S10. MRM data for representative 100 ng PFHp-1 Spiked Tube by TD-GC/MS/MS**

## References

- I. Abusallout, C. Holton, J. Wang, and D. Hanigan, Henry's Law Constants of 15 Per- and Polyfluoroalkyl Substances Determined by Static Headspace Analysis, *J. Haz. Mat. Lett.*, 2022, **3**, 100070.
- T. P. Bastow, B. D. Grant, and G. B. Davis, Volatilization Potential of Per - and Poly - fluoroalkyl Substances from Airfield Pavements and during Recycling of Asphalt, *Environ. Toxicol. Chem.*, 2022, **41(9)**, 2202-2208.



- H. Bertin, E. Del Campo Estrada, and O. Atteia, Foam placement for soil remediation, *Environ. Chem.*, 2017, **14(5)**, 338-343.
- S. Endo, J. Hammer, and S. Matsuzawa, Experimental Determination of Air/Water Partition Coefficients for 21 Per- and Polyfluoroalkyl Substances Reveals Variable Performance of Property Prediction Models, *Environ. Sci. Technol.*, 2023, **57(22)**, 8406-8413.
- ITRC (Interstate Technology Regulatory Council), Technical/Regulatory Guidance: Per- and Polyfluoroalkyl Substances (PFAS), 2022, <https://pfas-1.itrcweb.org/wp-content/uploads/2022/09/PFAS-Guidance-Document-9-2022.pdf>
- J. H. Johansson, M. E. Salter, J. C. Acosta Navarro, C. Leck, E. D. Nilsson, and I. T. Cousins, Global Transport of Perfluoroalkyl Acids Via Sea Spray Aerosol, *Environ. Sci. Processes & Impacts*, 2019, **21(4)**, 635-649.
- M. A. Kaiser, B. J. Dawson, C. A. Barton, and M. A. Botelho, Understanding potential exposure sources of perfluorinated carboxylic acids in the workplace, *Annals Occup. Hyg.*, 2010, **54(8)**, 915-922.
- J. Maire, and N. Fatin-Rouge, Surfactant foam flushing for in situ removal of DNAPLs in shallow soils, *J. Haz. Mat.*, 2017. **321**, 247-255.
- J. Roth, I. Abusallout, T. Hill, C. Holton, U. Thapa, and D. Hanigan, Release of Volatile Per- and Polyfluoroalkyl Substances from Aqueous Film-Forming Foam, *Environ. Sci. Technol. Lett.* 2020, **7(3)**, 164–170.
- T. Sakaki, P. E. Schulte, A. Cihan, J. A. Christ, and T. H. Illangasekare, Airflow pathway development as affected by soil moisture variability in heterogeneous soils, *Vadose Zone J.*, 2013, **12(1)**, 1-14.

- M. Shoeib, Harner, G. M. Webster, S. C. Lee. Indoor Sources of Poly- and Perfluorinated Compounds (PFCS) in Vancouver, Canada: Implications for Human Exposure. *Environ. Sci. Technol.*, 2011, **45**, 7999-8005.
- I. A. Titaley, F. B. De la Cruz, and J. A. Field, Comment on “Release of Volatile Per-and Polyfluoroalkyl Substances from Aqueous Film-Forming Foam, *Environ. Sci. Technol. Lett.*, 2020, **7(11)**, 866–868.
- T. Yamada, P. H. Taylor, R. C. Buck, M. A. Kaiser, and R. J. Giraud, Thermal Degradation of Fluorotelomer Treated Articles and Related Materials, *Chemosphere*, 2005, **61(7)**, 974-984.
- H. Yoo, J. W. Washington, J. J. Ellington, T. Jenkins, and M. P. Neill, Concentrations, distribution, and persistence of fluorotelomer alcohols in sludge-applied soils near Decatur, Alabama, USA, *Environ. Sci. Technol.*, 2010, **44(22)**, 8397-8402.
